# Supplementary material
Source: PubMed Central journal article supplement (PMC3221875)
Supplement: NIHMS328420-supplement-1.pdf [file NIHMS328420-supplement-1.pdf]

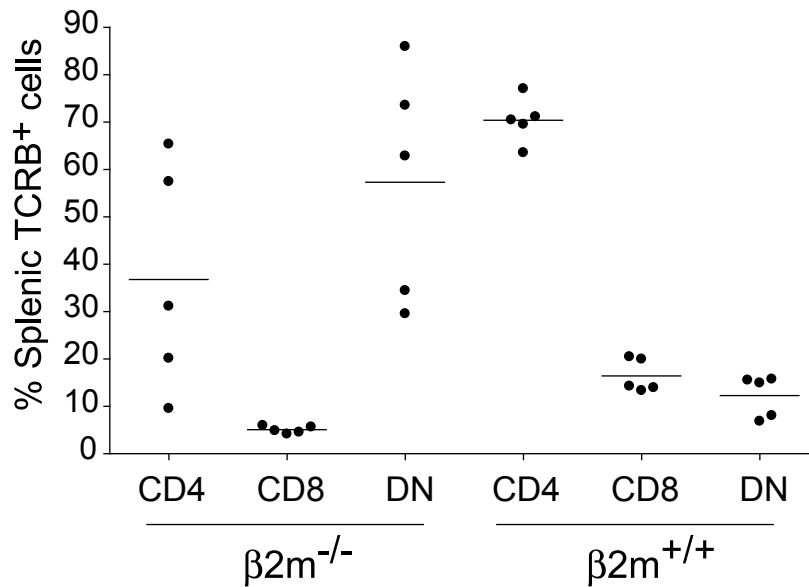

**Supplemental Figure S1. T cell engraftment in class I MHC deficient mice.** To define the requirement for class I MHC in the development and engraftment of G107S CD8<sup>+</sup> and DN T cells, transduced Rag1<sup>-/-</sup> $\beta 2m^{-/-}$  or Rag1<sup>-/-</sup> $\beta 2m^{+/+}$  HPC were transplanted into mice of the same genotype. Relative CD4, CD8, and DN T cell engraftment among splenocytes is shown. The data indicates that in the absence of class I MHC, residual though diminished relative engraftment of CD8<sup>+</sup> T cells and increased engraftment of DN cells is present ( $p < 0.01$  for each comparison).
